# Supplementary material for: Clinical Impact of Highly Purified, Whey Proteins in Patients Affected With Colorectal Cancer Undergoing Chemotherapy: Preliminary Results of a Placebo-Controlled Study
Source: PubMed Central journal article supplement — Integr Cancer Ther. 2019 Aug 2;18:1534735419866920. doi: 10.1177/1534735419866920 (PMC6681246; doi:10.1177/1534735419866920), 2019-08-02
Supplement: Supplement_proLYOtin_product_information.pdf [file Supplement_proLYOtin_product_information.pdf]

# PROLYOTIN®

## Highly purified whey protein

ProLYOtin® is the result of the purification of native proteins found in whey. It is designed to supply a source of high quality proteins with excellent nutritional value.

ProLYOtin® has been highly purified in order to obtain a product with a neutral taste, that has a lactose content below 2%. It can be used for nutritional, dietary, clinical and athletic purposes.

### HIGH NUTRITIONAL VALUE

High protein content

### HIGHLY DIGESTIBLE

Totally absorbable amino acids

### PURITY

90% purified whey proteins

### HIGHLY SOLUBLE

Easily soluble into water

### NEUTRAL TASTE

## The purification process

Our goal has been to develop a purification technology which maintains the bioavailability of amino acids naturally found within whey. Alteration of the milk proteins is probably caused by subsequent heat treatments and by changes in pH levels during transformation processes used in the dairy industry. Therefore, we have developed a purification and concentration technology that we define as “sweet” which is carried out through manufacturing techniques based on chromatography and membrane filtration (with ceramic membranes). Our proteins are not denatured by pasteurization (due to time or temperature) during any of the phases of the purification process. Our protein solutions are sterilized through filtration using 0.2µ membranes.

ProLYOtin®

## Manufacturing methods

Soluble proteins from milk whey are particularly rich in absorbable amino acids. However, these milk proteins have a distinct taste and smell. In order to incorporate them into our products we have developed an exclusive technology capable of resolving this problem thus making ProLYOtin® an extremely pure product ideal for use in nutritional, dietary and clinical practices.

## Packaging

- 500g bottle
- box containing 20 sachets of 15g

## Instructions for use

Add the product to water or to your food such, as soup (T<60°C), yogurt, puree, drinks, desserts and mix.

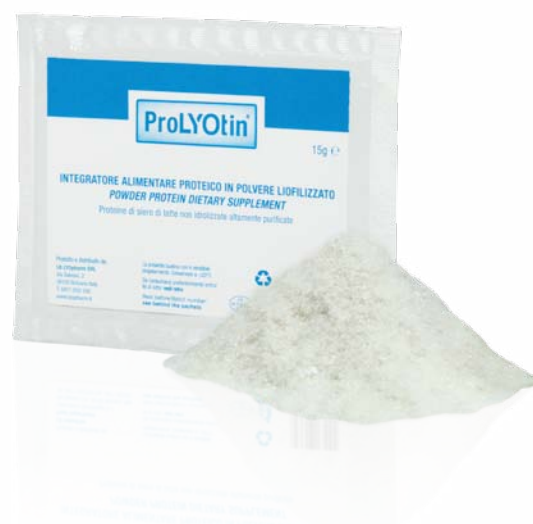

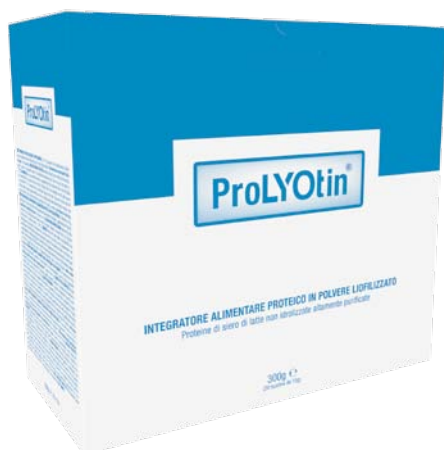

## NUTRITION FACTS

|                      | 100 g    | Serv. 15 g |
|----------------------|----------|------------|
| <b>Energy</b>        | 1538 kJ  | 230,7 kJ   |
|                      | 368 kcal | 55,2 kcal  |
| <b>Fats</b>          | 0 g      | 0 g        |
| Saturated            | 0 g      | 0 g        |
| <b>Carbohydrates</b> | 2 g      | 0,3 g      |
| Sugars               | 2 g      | 0,3 g      |
| <b>Proteins</b>      | 90 g     | 13,5 g     |
| <b>Salt</b>          | 0,2g     | 0,03g      |

Salt contained has to be due exclusively to the sodium naturally contained.

### AMINO ACID COMPOSITION

|               |                      |
|---------------|----------------------|
| Alanine       | 4,95g / 100g         |
| Arginine      | 1,86g / 100g         |
| Aspartic acid | 10,59g / 100g        |
| Cystine       | 2,53g / 100g         |
| Glutamic acid | 16,67g / 100g        |
| Glycine       | 1,51g / 100g         |
| Histidine     | 1,47g / 100g         |
| Isoleucine    | 6,01g / 100g         |
| Leucine       | 10,21g / 100g        |
| Lysine        | 8,86g / 100g         |
| Methionine    | 2,06g / 100g         |
| Phenylalanine | 2,79g / 100g         |
| Proline       | 5,05g / 100g         |
| Serine        | 4,25g / 100g         |
| Threonine     | 6,55g / 100g         |
| Tryptophan    | 1,81g / 100g         |
| Tyrosine      | 2,77g / 100g         |
| Valine        | 5,48g / 100g         |
| <b>TOTAL</b>  | <b>95,42g / 100g</b> |

### ORGANOLEPTIC CHARACTERISTICS

|        |                  |
|--------|------------------|
| Aspect | Powder           |
| Color  | Off white, cream |
| Odor   | Characteristic   |
